# Supplementary material
Source: Springer Nature journal article supplement (https://www.springermedizin.de/resource/supplementary/12955_2012_1125_MOESM2_ESM.pdf/9559334)

**EQ-5D index in study population**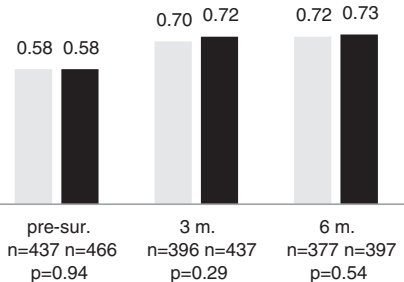**EQ-VAS\* in study population**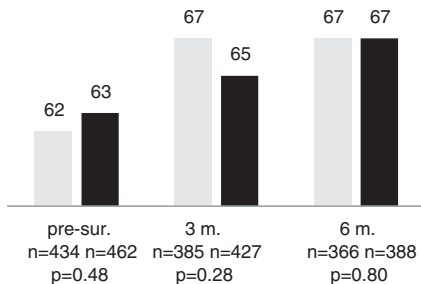**EQ-5D index in pts with unplanned ICU admission**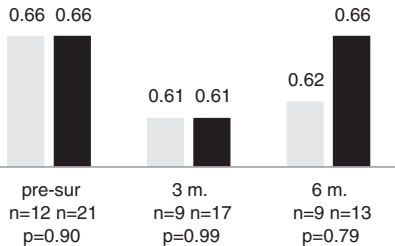**EQ-VAS\* in pts with unplanned IC admission**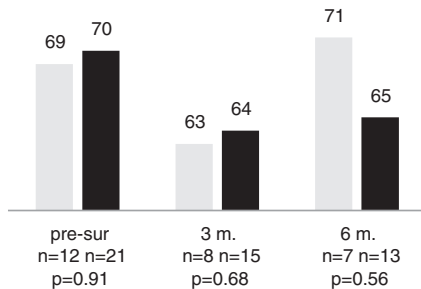

Supplement: MOESM2 [file 9559334]
